# Supplementary material for: Mobile element scanning (ME-Scan) identifies thousands of novel Alu insertions in diverse human populations
Source: HighWire-hosted journal article supplement (doi:10.1101/gr.148973.112), 2013-04-18
Supplement: SuppText_Legends_Tables.docx [file SuppText_Legends_Tables.docx]

# Supplementary Materials

# Supplementary Text

## Detection sensitivity for fixed reference *Alu*Yb8/9

A set of 1,703 *Alu*Yb8 or *Alu*Yb9 was identified in the hg19 human reference genome. *Alu* elements in this set contain high-quality matches to the *Alu*SPv2, *Alu*SPv3, and *Alu*BP2 primer binding sites (exact matches to the 10 nt at the 3' primer end and no more than 5 mismatches total) and are not known to be polymorphic: *i.e.* they are not listed in dbRIP (2011 release, hg19 coordinates) and were not identified by the Pilot 1000 Genomes project ([Stewart et al. 2011](#_ENREF_4))as polymorphic (see Supplementary Materials files dbRIP_AluMatch.txt and KG_AluMatch). Figure S1 shows the fraction of these presumably-fixed typical *Alu*Yb8/9 insertions that were observed with at least one coverage-corrected read set in each of 169 individuals as a function of their sequencing coverage. Even in a sample with very low coverage (<20,000 raw read sets), more than half of these loci are detected.

The above sensitivity estimation averages over the set of 1,703 presumed fixed *Alu*Yb8/9 loci, but sensitivity varies widely across loci. Figure S2 shows the per-locus sensitivity: the proportion of the 169 individuals in which each locus was detected. Approximately 80% of loci are detected in at least 95% of individuals, and 50% of loci are detected with sensitivity ≥99%. Excluding lower-coverage individuals increases estimates of per-locus sensitivity. When the 9 individuals with fewer than 100,000 read sets (unfiltered; see Figure S1 and Table S2) are excluded, the proportion of loci detected with ≥99% sensitivity rises to 70%, then further to 80% when a minimum coverage of 300,000 read sets is required.

Low-sensitivity insertion loci are primarily those in genomic regions that are duplicated, highly repetitive, or covered by nearly identical alternative haplotype assemblies in the hg19 reference. Short sequence reads generated from such insertions will often map to multiple positions in the reference genome. Since we used stringent criteria to map and filter the 50-bp sequence read at the *Alu*Yb8/9 junctions and rejected reads that did not map uniquely, evidence for insertions in such regions was often rejected. The 80% proportion of fixed *Alu*Yb8/9 that ME-Scan detects with high sensitivity matches the fraction of the genome in which 50 bp reads can be uniquely mapped ([computed from mappability results of Derrien et al. 2012', downloaded from the UCSC Genome Browser](#_ENREF_1)). Approximately 10% of the set of presumably-fixed typical *Alu*Yb8/9 insertions have long tracts (≥500 bp) of 5' flanking genomic sequence that are duplicated nearly exactly (99% identity) elsewhere in the genome ([Witherspoon et al. 2010](#_ENREF_6)). Insertions flanked by shorter repetitive regions can be detected if some fraction of read sets derived from them include non-duplicated sequence. In such cases, higher coverage increases the probability of observing those informative read sets and improves sensitivity, as observed above.

## Comparison with genotypes of Watkins et al. (2003)

To estimate the sensitivity and accuracy of ME-Scan in detecting known polymorphic *Alu*Yb8/9 insertions of intermediate frequency, we compared ME-Scan data with the results of Watkins et al. ([2003](#_ENREF_5)), who used locus-specific PCR and gel electrophoresis to genotype 41 *Alu*Yb8 insertion loci in 118 individuals who were also assayed in this study. The *Alu*Yb8 insertions in this comparison are full-length elements of intermediate population frequencies. They are located in genomic regions where robust locus-specific PCR assays could be designed, so ME-Scan read sets derived from them are likely to be uniquely mappable. The ME-Scan and electrophoresis results for each locus in each individual are given in the Supplementary Materials (file Comparative_Genotypes.txt). One of the 41 *Alu*Yb8 insertions (YB8NBC479) is truncated by approximately 100 bp at the 5' GC-rich end, and therefore produces no reads in ME-Scan, since ME-Scan requires a primer-annealing site in the 5' end of full-length *Alu* elements. We generated fewer than 100,000 indexed read sets for eight of the 118 individuals, so they are expected to have high false negative rates and were excluded from this analysis.

The results of the comparison of coverage-corrected ME-Scan presence/absence calls (see Methods) with presence/absence states derived from electrophoresis genotypes for the 40 full-length *Alu*Yb8 insertions in the 110 higher-coverage individuals are summarized in Table S3. Since known polymorphic *Alu*Yb8/9 insertions are very reliable even when supported by as few as two coverage-corrected read sets (Figure 2, green lines), we used that as the threshold to call insertions as present at these loci. Across 4,350 comparisons between ME-Scan calls and genotypes from Watkins et al., the concordance rate is 95.1% (upper half of Table S3). These concordance rates place upper bounds on the error rates of ME-Scan, yielding a 5.1% false negative rate and a 4.6% false positive rate (94.9% sensitivity, 95.4% specificity). Actual error rates may be lower than these estimates based on discordance rates, since ME-Scan has previously uncovered false negative results of gel genotyping assays ([four cases in which ME-Scan was more sensitive than gel genotyping; Witherspoon et al. 2010, Table 6](#_ENREF_6)). ME-Scan requires only two primers to hybridize to the genomic *Alu*Yb8/9 insertion locus (for amplification and sequencing) and can detect even poorly-amplifying loci given sufficient coverage, while gel genotyping assays require two robust and specific PCR reactions using three or four primers, so some sensitivity advantage may be expected for ME-Scan.

For individuals that have homozygous insertion-present genotypes at a locus in the Watkins et al. ([2003](#_ENREF_5)) data set referenced above (1,505 individual genotypes, Table S3), ME-Scan yields an average of 35.5 coverage-corrected read sets (std. dev. 27.7). For heterozygous insertions (per electrophoresis; 1,507 genotypes), ME-Scan yields 17.1 read sets (std. dev. 14.9), or essentially half as many, as expected (Figure S3). Since the number of reads from an insertion locus in an individual is correlated with the number of copies of that insertion, it is not surprising that the number of discordances where ME-Scan reports no insertion and Watkins et al. report a heterozygote is higher (133/1507 = 9.1%) than the number of ME-Scan negative discordances where electrophoresis reports a homozygous insertion-present state (20/1505 = 1.3%). Restricting this analysis to individuals with higher coverage (32 with >300,000 read sets) lowers that discordance rate to 7.9%, indicating that higher coverage can compensate for the lower representation of heterozygous insertions in the template DNA.

The relationship between read number and heterozygous vs. homozygous-present genotype states suggests a means of distinguishing between those states. To explore this possibility, for each of the 40 loci considered here, we estimated the frequency *f* of the insertion allele as (1–√ *a*), where *a* is the number of insertion-absent states at that locus among the 110 higher-coverage individuals. We calculated the expected proportion of insertion-present states that should be homozygous present or heterozygous genotypes, assuming Hardy-Weinberg equilibrium. We ranked the individuals with insertion-present states by the number of coverage-corrected reads observed, then assigned the expected number of homozygous-present genotypes to the individuals with the highest numbers of reads and heterozygous genotypes to individuals with fewer reads, down to the threshold required to call the insertion present. Those with fewer than two coverage-corrected read sets at the locus were assigned the homozygous insertion-absent genotype.

The resulting genotype assignments were compared to the genotypes obtained by Watkins et al. ([2003](#_ENREF_5)) by PCR and gel electrophoresis, and the comparison is summarized in Table S3 (lower section). The genotype concordance rate is 70.6% overall: 95.4% for homozygous absent genotypes, 78.8% for heterozygotes, and 40.2% for homozygous-present genotypes. ME-Scan correctly identifies the presence of an insertion in 94.9% of the heterozygous and homozygous-present genotypes (Table S3, top half; and see above), but it is difficult to distinguishing heterozygous from homozygous-present states due to the high variance in the number of read sets derived from an insertion. Many heterozygous individuals yield more coverage-corrected reads at a given locus than do individuals with the homozygous-present state (Figure S3).

Absent some other source of information (e.g. SNP-based imputation) or a reduction in the variances of these read number distributions, the overlap of distributions limits our ability to distinguish heterozygous from homozygous-present individuals at loci with intermediate-frequency *Alu* insertions. However, for the rare insertions that constitute the majority of the thousands of novel *Alu* insertions we discovered, genotyping is straightforward, since every insertion-present state is almost certainly due to a heterozgyote.

## Comparison with Venter HuRef genome sequence

We identified 3,098 *AluYb8/9* elements in HuRef. This set consists of 2,932 *AluYb8/9* elements that are also present in the hg19 human reference genome assembly (i.e, not annotated as absent in Venter; [Xing et al. 2009](#_ENREF_7)) and 166 *Alu*Yb8/9 insertions that are absent in hg19 ([Xing et al. 2009](#_ENREF_7)). Of these insertions, ME-Scan detects 2,118 (68%), using a threshold of at least 10 supporting reads to account for the high coverage obtained for this sample (1.4 million read sets). Since ME-Scan uses element-specific primers for amplification and sequencing, it cannot detect insertions that lack the corresponding primer annealing sites. *Alu* insertions with flanking sequences that are not unique in the genome are also likely to go undetected, since the bioinformatic processing relies on uniquely mapping read pairs to the reference genome. Of the 980 Venter *AluYb8/9* insertions not detected by ME-Scan, most (675) lack one or both of the primer annealing sites required by ME-Scan. This is often because the *Alu* elements are truncated to less than 200 bp (410 of 675 cases). By way of comparison, the span covering both primer sites in the *Alu*Yb8 consensus sequence is 252 bp. Of the 305 Venter *Alu*Yb8/9 elements that have the requisite primer annealing sites but were not detected by ME-Scan, most (178) are in regions where short reads are difficult to map uniquely ([average mappability of 50 bp reads ≤0.5 in the 300 bp flanking the Alu insertion point; Derrien et al. 2012', UCSC Genome Browser](#_ENREF_1)). These loci are likely to be lost at the mapping stage. Thus we expect 2,065 *Alu*Yb8/9 in Venter to be readily accessible to ME-Scan, and 1,938 of those (94%) are detected. Of the 1,033 Venter *Alu*Yb8/9 insertions that are less accessible, only 180 are observed by ME-Scan in Venter DNA.

To estimate the false discovery rate of ME-Scan, we considered the set of 2,311 *Alu* insertions that were detected by ME-Scan in Dr. Venter's DNA (supported by at least 10 read sets and excluding insertions known to be of subfamilies other than *Alu*Yb8/9, as labeled in hg19 reference or HuRef assemblies). Of those, 2,118 were present in HuRef and 193 (8%) were absent. Nearly all of these putative false positives were observed by ME-Scan in other individuals (173/193; 39 are present in hg19). False positives at never-before observed insertion loci are far fewer: ME-Scan detected just 21 insertions as singletons in Venter, and of these, 19 (<1% of the 2,311 in the set) were absent in HuRef and are presumed to be false positives.

*AluYa5* are strongly discriminated against due to the lack of the *AluBP2* primer site. Of 236 *AluYa5* present as insertions in HuRef relative to hg19, 5 generated at least one read in ME-Scan in Dr. Venter's DNA, and one generated enough to be called present (18 reads). In comparison, the median number of reads for *Alu*Yb8/9 present in HuRef but not hg19 is 157.

## Locus-specific validation by PCR and electrophoresis

Primers flanking 76 candidate loci were designed using Primer3 ([http://frodo.wi.mit.edu ; Rozen and Skaletsky 2000](#_ENREF_3)) and screened using UCSC In-Silico PCR (http://genome.ucsc.edu/cgi-bin/hgPcr) to select primer pairs that produce a unique PCR product in the human genome (Table S4 and S5). Primers were initially tested using a DNA pool of 12 HapMap YRI individuals to determine the appropriate annealing temperature. Each locus was then screened in an individual in whom the candidate insertion was identified. PCR amplification was performed with 10 or 20 ng of genomic DNA in 25 μl reactions as follows: denaturation at 95 °C (3 min); 30 cycles of 95 °C (30 s), 55°C or 60°C (60 s), and 72°C (30 s); and a final extension at 72 °C (1 min). PCR reagents included 500 nM of each oligonucleotide primer and GoTaq® Hot Start Green Master Mix (Promega). PCR products were run on 2% agarose gels with 0.25 µg of ethidium bromide and visualized using UV fluorescence.

ME-Scan indicates an *Alu* insertion in intron 86 of *HERC2*, in a region that is a protein-coding exon of an alternatively-spliced mRNA of *HERC2*. Locus-specific PCR of the originating sample indicates a small insertion at the site (~35 bp), which is not expected for an *Alu* insertion that could be detected by ME-Scan, so we regard it as a false positive.

## Population-specific insertions

We searched for *Alu* insertions that are limited to single populations in our sample. Among 5,060 *Alu* insertion loci observed across 108 individuals with at least 100,000 read sets that were assayed using primer *Alu*SPv2, 1,109 insertions are observed in only one population (111 are limited to TSI, 143 to Brahmin, 88 to Hema, 93 to Alur, 311 to Luhya, and 363 to Pygmy). Most of the population-specific insertions are singletons. The more common population specific insertions (up to 9 observations) are observed in African populations, particularly in Pgymy. Insertions were counted as present in an individual if at least 3 coverage-corrected reads were observed. The loci are listed in Supplementary file Pop_Specific_Alu.txt.

## Genomic distribution of rare vs. common *Alu*Yb8/9

To detect differences in the genomic contexts of common vs. rare insertions, we analyzed the set of *AluY*b8/9 insertions that were polymorphic in 110 individuals assayed using primer *AluSPv2* (4,636 loci; detection threshold of 3 coverage-corrected reads). We observed a slight but significant negative correlation between the number of individuals in which an insertion was detected and the number of other *Alu* elements (all subfamilies) within 25 kb of its insertion point (Pearson ρ= 0.04, *P*<0.006; similar for ranges of 5-80 kb up- and downstream). This is consistent with the greater 'coclustering' of older vs. younger *Alu* elements observed by Jurka et al. ([2004](#_ENREF_2)).

No significant relationship between G+C content and insertion frequency was observed at the ranges in which coclustering was seen (5-80 kb). For windows of +/– 1 kb around an insertion (excluding +/– 35 bp around the insertion point to avoid target site effects), a small negative correlation between frequency and GC content was observed (Pearson ρ= 0.036, *P*<0.02). Thus the short-range genomic context of rare *Alu* insertions appears slightly more GC-rich than that of older insertions.

Rare *Alu* insertions in this set are more likely to be found in exons than common insertions are (point-bivariate correlation of frequency vs. intronic status, Pearson ρ= –0.045, *P*<0.003). This is consistent with the depletion of common *Alu* insertions, but not of rare ones, from exons (Results, main text). Rare and common *Alu* insertions are equally likely to be found in introns.

## Accuracy of *Alu* insertion positions

To determine the accuracy with which ME-Scan is able to determine the position of *Alu* insertions, we compared the positions estimated for known *Alu*Yb8/9 by ME-Scan to those estimated by RepeatMasker. ME-Scan estimates the 5' end of each *AluYb8/9* under the assumption that they are full-length. RepeatMasker identifies the end of an *Alu* element by sequence alignment to the subfamily consensus. The differences between these position estimates are summarized in Figure S7. The position estimates are identical in 79% of comparisons and differ by no more than 7 bp in 99% of cases (mean difference = 0.57 bp).

The positions predicted by ME-Scan are determined by the position of the primer annealing site. For *Alu* elements present in the hg19 reference, that position can also be computed using primer annealing sites identified by BLAST. The two estimates are identical to the base pair for 98% of 2,630 *AluYb8/9* in hg19 and observed in at least one individual using ME-Scan. This implies that most of the differences observed in Figure S7 are due to modest truncations or mutations of *Alu* 5' ends, consistent with the observations of Zingler et al. ([2005](#_ENREF_8)).

# Figures

## Figure S1

Figure S1: Sensitivity of ME-Scan for a set of 1,703 presumably fixed *Alu*Yb8/9 insertions versus coverage for each of 169 individuals from 11 populations. The percentage of this set of insertions that were observed by ME-Scan in each individual is plotted against the total read coverage (log-scaled) for the individual, pooled across multiple replicates of an individual where applicable. Individuals are color-coded by source population according to the legend. The leftmost point represents individual AFP19, in which >50% of this set of *Alu*Yb8/9 were detected even though fewer than 20,000 raw read sets (including unmapped reads and those lacking *Alu* sequence) were obtained.

## Figure S2

Figure S2: Sensitivity of ME-Scan for each of 1,703 presumably fixed *Alu*Yb8 or *Alu*Yb9 insertion loci, estimated as the proportion of individuals in which each insertion was observed. Loci are ordered by increasing sensitivity.

## Figure S3

Figure S3: Distributions of coverage-normalized numbers of sequence reads supporting *Alu* insertions in individuals and loci where gel-based genotyping indicated either no insertion (black), a heterozygous state (green), or a homozygous present genotype. Means ± one standard deviation are shown above the distributions. The vertical axis is broken to include the large number of homozygous-absent genotypes for which no ME-Scan reads were observed. Read numbers are normalized for variations in individual coverage by dividing by the number of total mapped reads in an individual and multiplying by the median number of mapped reads per individual in the set of individuals analyzed here (110 individuals, 40 *Alu*Yb8 loci).

## Figure S4

Figure S4: Heat maps comparing counts of *Alu* insertions in pairs of population samples. The populations compared are given along the horizontal (x) and vertical (y) axes. The Pearson correlation coefficient of the insertion presence counts by locus in each population is given below each panel, along with the number of variable loci represented in the panel. The numbers of individuals in a sample in which an insertion could be observed (from 0 to the number of individuals in the sample) are represented on the x and y axes. The numbers of *Alu* insertion loci observed in (x, y) individuals in the pair of populations are represented as colors according to the legend bar (log scale). Only *Alu* insertion loci that were novel or previously observed as polymorphic (a subset of those in Table 1) were used. An insertion was counted as present in an individual if at least 10 coverage-corrected reads were observed from that individual. Panels comparing larger sets of individuals (e.g. Pygmy vs. other African samples, African vs. Brahmin and TSI) are also shown. Eighteen comparisons involve population samples that were assayed using different sequencing primers (*AluSPv2* for most populations and *AluSPv3* for the Irula, Mala and Madiga). Those panels are divided from the others with a gray line (lower left). Some *Alu* insertions have mutations or truncations in their 5' ends and therefore amplify preferentially with one or the other primer. Such loci may appear to have high frequency in the population assayed using one primer and low frequency in the other population. This is most evident in the panel comparing Brahmin and TSI samples assayed using *AluSPv2* to the samples assayed using *AluSPv3*.

## Figure S5

Figure S5: Nucleotide profiles based on the hg19 reference genome at positions within 30 bp of *Alu*Yb8/9 insertion points (4706 loci assayed across 110 individuals using primer *AluSPv2*). Positions are relative to the 5' GC-rich end of a + strand *Alu* insertion at position zero. Genomic flanks were reverse-complemented for – strand *Alu* insertions prior to counting.

## Figure S6

Figure S6: Novel *Alu* insertion (red triangle) interrupting the first protein-coding exon of *FAM187B* (family with sequence similarity 187, member B). The UCSC genome browser diagram of the genomic region spanning the gene is shown, with tracks as defined at http://genome.ucsc.edu/ .

## Figure S7

Figure S7: Accuracy of predicted positions of *Alu* insertion points. The differences between RepeatMasker and ME-Scan estimates of the positions of the 5' (GC-rich) ends of 1,979 *AluYb8/9* insertions are summarized in two histograms, black for + strand *Alu* and gray for – strand *Alu* (*n* = 998 and 981, respectively). In 95% of cases, the difference ranges from -1 to 4 bp (-4 to 1 for minus-strand *Alu*).

# Tables

## Table S1

Table S1: Yields of sequencing read sets in ME-Scan libraries

| Library | TSI | Brahmin | Variable | African | LWK | Mala+ Madiga | Irula | Total | Percent |
| --- | --- | --- | --- | --- | --- | --- | --- | --- | --- |
| Samples | 25 | 25 | 24 | 25 | 25 | 25 | 25 | 174 | 0.0 |
| Read Sets | 4568855 | 6555168 | 10138904 | 9684271 | 8391086 | 7227429 | 7766181 | 54331894 | 100 |
| Indexed1 Read Sets | 4164166 | 5243737 | 9671757 | 8578708 | 7292274 | 6464689 | 6646947 | 48062278 | 88.5 |
| *Alu*-positive (*Alu*+)2 | 4527554 | 6505844 | 10086203 | 9628144 | 8335564 | 7183128 | 7715069 | 53981506 | 99.4 |
| Indexed, *Alu*+ | 4161612 | 5234040 | 9664077 | 8569914 | 7281942 | 6461067 | 6635486 | 48008138 | 88.4 |
| Mapped3 | 2184581 | 2693993 | 8197666 | 6146018 | 4621934 | 4300853 | 3561627 | 31706672 | 58.4 |
| Indexed, *Alu*+, Mapped | 2061535 | 2367072 | 7949853 | 5622883 | 4252914 | 3996053 | 3210192 | 29460502 | 54.2 |
| Reference *Alu*4 | 2059034 | 2364387 | 7941715 | 5616571 | 4246790 | 3990202 | 3203185 | 29421884 | 54.2 |
| Reference *Alu*Yb8/95 | 1542079 | 1730412 | 5830036 | 4197113 | 3172537 | 3096677 | 2349167 | 21918021 | 40.3 |
| Non-Reference *Alu* insertions6 | 111296 | 129612 | 577416 | 411672 | 309097 | 229895 | 177035 | 1946023 | 3.6 |

1: "Indexed" denotes read sets that could be assigned to an individual based on the 9-bp index in the third read.

2: "*Alu*+" denotes read sets that contained the expected *Alu* sequence in the second (*Alu*-internal) read.

3: "Mapped" read sets mapped uniquely to the reference genome.

4: Read sets that derive from *Alu* insertions or other sources present in the hg19 human reference genome.

5: Read sets derived from reference human genome *Alu*Yb8/9 elements, as identified by RepeatMasker.

6: ME-Scan read sets that have proper indexes, contain the expected *Alu* internal sequence, mapped uniquely to the human reference genome, and cannot be explained by primer sites in the reference sequence.

## Table S2

Table S2: Target and observed pooling proportions for 174 indexed samples in 7 ME-Scan libraries.

| Library | Population | % Target1 | Ind. | Index | Number of Indexed, *Alu*+, Mapped read sets | % obs.2 | Number of Indexed read sets | % obs.3 |
| --- | --- | --- | --- | --- | --- | --- | --- | --- |
| African | Alur | 4.0 | AFA1 | ACCTAGGAC | 307041 | 5.5 | 451176 | 5.3 |
| African | Alur | 4.0 | AFA2 | TGGATGGAT | 316625 | 5.6 | 477673 | 5.6 |
| African | Alur | 4.0 | AFA3 | CATGTAGTC | 180859 | 3.2 | 264714 | 3.1 |
| African | Alur | 4.0 | AFA4 | TAGACCGTC | 273401 | 4.9 | 424326 | 4.9 |
| African | Alur | 4.0 | AFA5 | CAGAGGACA | 282935 | 5.0 | 417903 | 4.9 |
| African | Alur | 4.0 | AFA8 | CTCTAGTCG | 154775 | 2.8 | 234419 | 2.7 |
| African | Alur | 4.0 | AFA9 | AGTAACGGC | 124136 | 2.2 | 225026 | 2.6 |
| African | Alur | 4.0 | AFA12 | GGCGAAGTT | 179747 | 3.2 | 278829 | 3.3 |
| African | Hema | 4.0 | AFH1 | GTGACGTCT | 272817 | 4.9 | 416774 | 4.9 |
| African | Hema | 4.0 | AFH2 | ACACGAGTT | 223860 | 4.0 | 344499 | 4.0 |
| African | Hema | 4.0 | AFH3 | CGCATCTTA | 330848 | 5.9 | 511351 | 6.0 |
| African | Hema | 4.0 | AFH4 | AAGCACGAT | 260681 | 4.6 | 408072 | 4.8 |
| African | Hema | 4.0 | AFH5 | CCACAGTAA | 162873 | 2.9 | 245448 | 2.9 |
| African | Hema | 4.0 | AFH6 | GCTGGATGT | 163443 | 2.9 | 241321 | 2.8 |
| African | Hema | 4.0 | AFH7 | TGTGACTCT | 187437 | 3.3 | 296843 | 3.5 |
| African | Hema | 4.0 | AFH8 | GCATAGCCT | 249812 | 4.4 | 377228 | 4.4 |
| African | Hema | 4.0 | AFH9 | CTCTCAGAT | 325696 | 5.8 | 497913 | 5.8 |
| African | Hema | 4.0 | AFH10 | CTATATCGC | 159569 | 2.8 | 224020 | 2.6 |
| African | Pygmy | 4.0 | AFP2 | ATCCGCTTG | 193719 | 3.4 | 305925 | 3.6 |
| African | Pygmy | 4.0 | AFP4 | TCTAGCTAG | 168414 | 3.0 | 252687 | 2.9 |
| African | Pygmy | 4.0 | AFP5 | GACCAATCA | 236721 | 4.2 | 375927 | 4.4 |
| African | Pygmy | 4.0 | AFP10 | GTCCTTCGT | 180774 | 3.2 | 289956 | 3.4 |
| African | Pygmy | 4.0 | AFP20* | GTAGACATC | 196359 | 3.5 | 293532 | 3.4 |
| African | Pygmy | 4.0 | AFP23 | CCTAAGGTT | 192002 | 3.4 | 297516 | 3.5 |
| African | Pygmy | 4.0 | AFP33 | AGCCTGTCT | 298339 | 5.3 | 425630 | 5.0 |
| LWK | LWK | 4.0 | NA19372 | GCATAGCCT | 132057 | 3.1 | 220082 | 3.0 |
| LWK | LWK | 4.0 | NA19020 | ATCCGCTTG | 126867 | 3.0 | 225997 | 3.1 |
| LWK | LWK | 4.0 | NA19027 | TCTAGCTAG | 184305 | 4.3 | 303709 | 4.2 |
| LWK | LWK | 4.0 | NA19028 | GACCAATCA | 257103 | 6.0 | 469013 | 6.4 |
| LWK | LWK | 4.0 | NA19031 | GTCCTTCGT | 147058 | 3.5 | 239880 | 3.3 |
| LWK | LWK | 4.0 | NA19035 | GTAGACATC | 157313 | 3.7 | 259432 | 3.6 |
| LWK | LWK | 4.0 | NA19041 | CCTAAGGTT | 169658 | 4.0 | 286579 | 3.9 |
| LWK | LWK | 4.0 | NA19044 | AGCCTGTCT | 189068 | 4.4 | 311342 | 4.3 |
| LWK | LWK | 4.0 | NA19046 | ACCTAGGAC | 144713 | 3.4 | 239233 | 3.3 |
| LWK | LWK | 4.0 | NA19307 | TGGATGGAT | 167608 | 3.9 | 285064 | 3.9 |
| LWK | LWK | 4.0 | NA19308 | CATGTAGTC | 144045 | 3.4 | 230444 | 3.2 |
| LWK | LWK | 4.0 | NA19309 | TAGACCGTC | 188421 | 4.4 | 323434 | 4.4 |
| LWK | LWK | 4.0 | NA19311 | CAGAGGACA | 199571 | 4.7 | 343695 | 4.7 |
| LWK | LWK | 4.0 | NA19312 | CTCTCAGAT | 163953 | 3.9 | 281212 | 3.9 |
| LWK | LWK | 4.0 | NA19317 | CTCTAGTCG | 173224 | 4.1 | 289283 | 4.0 |
| LWK | LWK | 4.0 | NA19318 | CTATATCGC | 92266 | 2.2 | 145631 | 2.0 |
| LWK | LWK | 4.0 | NA19319 | AGTAACGGC | 134856 | 3.2 | 279729 | 3.8 |
| LWK | LWK | 4.0 | NA19331 | GGCGAAGTT | 165518 | 3.9 | 277676 | 3.8 |
| LWK | LWK | 4.0 | NA19334 | GTGACGTCT | 216390 | 5.1 | 365945 | 5.0 |
| LWK | LWK | 4.0 | NA19346 | ACACGAGTT | 167024 | 3.9 | 279804 | 3.8 |
| LWK | LWK | 4.0 | NA19347 | CGCATCTTA | 199823 | 4.7 | 350810 | 4.8 |
| LWK | LWK | 4.0 | NA19350 | AAGCACGAT | 199748 | 4.7 | 357259 | 4.9 |
| LWK | LWK | 4.0 | NA19352 | CCACAGTAA | 217071 | 5.1 | 390835 | 5.4 |
| LWK | LWK | 4.0 | NA19359 | GCTGGATGT | 163988 | 3.9 | 270898 | 3.7 |
| LWK | LWK | 4.0 | NA19371 | TGTGACTCT | 151266 | 3.6 | 265288 | 3.6 |
| Brahmin | Brahmin | 4.0 | B11 | GTAGACATC | 92378 | 3.9 | 192495 | 3.7 |
| Brahmin | Brahmin | 4.0 | B17 | AGCCTGTCT | 98131 | 4.1 | 206809 | 3.9 |
| Brahmin | Brahmin | 4.0 | BN9 | GACCAATCA | 141433 | 6.0 | 336078 | 6.4 |
| Brahmin | Brahmin | 4.0 | BN50 | CCACAGTAA | 134874 | 5.7 | 314121 | 6.0 |
| Brahmin | Brahmin | 4.0 | BN51 | GCTGGATGT | 92284 | 3.9 | 195334 | 3.7 |
| Brahmin | Brahmin | 4.0 | BN52 | AGTAACGGC | 77707 | 3.3 | 222670 | 4.2 |
| Brahmin | Brahmin | 4.0 | BN55 | GCATAGCCT | 85124 | 3.6 | 178395 | 3.4 |
| Brahmin | Brahmin | 4.0 | BV2 | ATCCGCTTG | 69344 | 2.9 | 164465 | 3.1 |
| Brahmin | Brahmin | 4.0 | BV5 | TCTAGCTAG | 98450 | 4.2 | 197191 | 3.8 |
| Brahmin | Brahmin | 4.0 | BV10 | GTCCTTCGT | 71002 | 3.0 | 145768 | 2.8 |
| Brahmin | Brahmin | 4.0 | BV12 | CCTAAGGTT | 87610 | 3.7 | 191779 | 3.7 |
| Brahmin | Brahmin | 4.0 | BV25 | ACCTAGGAC | 86556 | 3.7 | 183893 | 3.5 |
| Brahmin | Brahmin | 4.0 | BV29 | TGGATGGAT | 98049 | 4.1 | 206336 | 3.9 |
| Brahmin | Brahmin | 4.0 | BV32 | CATGTAGTC | 78718 | 3.3 | 164009 | 3.1 |
| Brahmin | Brahmin | 4.0 | BV33 | TAGACCGTC | 93866 | 4.0 | 214571 | 4.1 |
| Brahmin | Brahmin | 4.0 | BV34 | CAGAGGACA | 104303 | 4.4 | 222264 | 4.2 |
| Brahmin | Brahmin | 4.0 | BV35 | CTCTCAGAT | 91631 | 3.9 | 209174 | 4.0 |
| Brahmin | Brahmin | 4.0 | BV36 | CTCTAGTCG | 108782 | 4.6 | 228208 | 4.4 |
| Brahmin | Brahmin | 4.0 | BV38 | CTATATCGC | 50320 | 2.1 | 100691 | 1.9 |
| Brahmin | Brahmin | 4.0 | BV39 | TGTGACTCT | 103985 | 4.4 | 235596 | 4.5 |
| Brahmin | Brahmin | 4.0 | BV40 | GGCGAAGTT | 94219 | 4.0 | 214136 | 4.1 |
| Brahmin | Brahmin | 4.0 | BV42 | GTGACGTCT | 120584 | 5.1 | 265991 | 5.1 |
| Brahmin | Brahmin | 4.0 | BV43 | ACACGAGTT | 67786 | 2.9 | 144796 | 2.8 |
| Brahmin | Brahmin | 4.0 | BV44 | CGCATCTTA | 88833 | 3.8 | 196330 | 3.7 |
| Brahmin | Brahmin | 4.0 | BV45 | AAGCACGAT | 131103 | 5.5 | 312637 | 6.0 |
| Irula | Irula | 4.0 | I1 | ATCCGCTTG | 113853 | 3.5 | 234046 | 3.5 |
| Irula | Irula | 4.0 | I2 | TCTAGCTAG | 126179 | 3.9 | 247708 | 3.7 |
| Irula | Irula | 4.0 | I3 | GACCAATCA | 201526 | 6.3 | 420076 | 6.3 |
| Irula | Irula | 4.0 | I5 | GTCCTTCGT | 125363 | 3.9 | 263826 | 4.0 |
| Irula | Irula | 4.0 | I6 | GTAGACATC | 107053 | 3.3 | 213787 | 3.2 |
| Irula | Irula | 4.0 | I7 | CCTAAGGTT | 159722 | 5.0 | 326102 | 4.9 |
| Irula | Irula | 4.0 | I8 | AGCCTGTCT | 142150 | 4.4 | 262215 | 3.9 |
| Irula | Irula | 4.0 | I9 | ACCTAGGAC | 153813 | 4.8 | 318429 | 4.8 |
| Irula | Irula | 4.0 | I10 | TGGATGGAT | 130226 | 4.1 | 264138 | 4.0 |
| Irula | Irula | 4.0 | I11 | CATGTAGTC | 118729 | 3.7 | 237147 | 3.6 |
| Irula | Irula | 4.0 | I12 | TAGACCGTC | 142271 | 4.4 | 285271 | 4.3 |
| Irula | Irula | 4.0 | I13 | CAGAGGACA | 128642 | 4.0 | 256469 | 3.9 |
| Irula | Irula | 4.0 | I14 | CTCTCAGAT | 102514 | 3.2 | 221953 | 3.3 |
| Irula | Irula | 4.0 | I15 | CTCTAGTCG | 63727 | 2.0 | 129385 | 1.9 |
| Irula | Irula | 4.0 | I16 | CTATATCGC | 73299 | 2.3 | 139343 | 2.1 |
| Irula | Irula | 4.0 | I17 | AGTAACGGC | 91632 | 2.9 | 222343 | 3.3 |
| Irula | Irula | 4.0 | I20 | GGCGAAGTT | 112923 | 3.5 | 234463 | 3.5 |
| Irula | Irula | 4.0 | I22 | GTGACGTCT | 159464 | 5.0 | 331458 | 5.0 |
| Irula | Irula | 4.0 | I23 | ACACGAGTT | 123062 | 3.8 | 254323 | 3.8 |
| Irula | Irula | 4.0 | I25 | CGCATCTTA | 114041 | 3.6 | 254252 | 3.8 |
| Irula | Irula | 4.0 | I26 | AAGCACGAT | 187920 | 5.9 | 403261 | 6.1 |
| Irula | Irula | 4.0 | I27 | CCACAGTAA | 151823 | 4.7 | 340128 | 5.1 |
| Irula | Irula | 4.0 | I28 | GCTGGATGT | 124736 | 3.9 | 255970 | 3.9 |
| Irula | Irula | 4.0 | I31 | TGTGACTCT | 120125 | 3.7 | 253028 | 3.8 |
| Irula | Irula | 4.0 | I32 | GCATAGCCT | 135399 | 4.2 | 277826 | 4.2 |
| Mala, Madiga | Madiga | 4.0 | M3 | ATCCGCTTG | 132854 | 3.3 | 222072 | 3.4 |
| Mala, Madiga | Madiga | 4.0 | M4 | TCTAGCTAG | 158006 | 4.0 | 246784 | 3.8 |
| Mala, Madiga | Madiga | 4.0 | M7 | GACCAATCA | 244639 | 6.1 | 406137 | 6.3 |
| Mala, Madiga | Madiga | 4.0 | M11 | GTCCTTCGT | 117615 | 2.9 | 186536 | 2.9 |
| Mala, Madiga | Madiga | 4.0 | M12 | GTAGACATC | 144598 | 3.6 | 228243 | 3.5 |
| Mala, Madiga | Madiga | 4.0 | M13 | CCTAAGGTT | 146529 | 3.7 | 238158 | 3.7 |
| Mala, Madiga | Madiga | 4.0 | M14 | AGCCTGTCT | 161997 | 4.1 | 252717 | 3.9 |
| Mala, Madiga | Madiga | 4.0 | M15 | ACCTAGGAC | 193882 | 4.9 | 307586 | 4.8 |
| Mala, Madiga | Madiga | 4.0 | M16 | TGGATGGAT | 152940 | 3.8 | 244875 | 3.8 |
| Mala, Madiga | Madiga | 4.0 | M17 | CATGTAGTC | 147748 | 3.7 | 229006 | 3.5 |
| Mala, Madiga | Madiga | 4.0 | M18 | TAGACCGTC | 174812 | 4.4 | 282862 | 4.4 |
| Mala, Madiga | Madiga | 4.0 | M19 | CAGAGGACA | 225851 | 5.7 | 364687 | 5.6 |
| Mala, Madiga | Madiga | 4.0 | M23 | CTCTCAGAT | 147738 | 3.7 | 241246 | 3.7 |
| Mala, Madiga | Madiga | 4.0 | M24 | CTCTAGTCG | 157770 | 3.9 | 252103 | 3.9 |
| Mala, Madiga | Madiga | 4.0 | M25 | CTATATCGC | 90698 | 2.3 | 138164 | 2.1 |
| Mala, Madiga | Mala | 4.0 | ML1 | AGTAACGGC | 161845 | 4.1 | 296400 | 4.6 |
| Mala, Madiga | Mala | 4.0 | ML5 | GGCGAAGTT | 143707 | 3.6 | 231123 | 3.6 |
| Mala, Madiga | Mala | 4.0 | ML6 | GTGACGTCT | 159970 | 4.0 | 256697 | 4.0 |
| Mala, Madiga | Mala | 4.0 | ML7 | ACACGAGTT | 160805 | 4.0 | 260371 | 4.0 |
| Mala, Madiga | Mala | 4.0 | ML8 | CGCATCTTA | 153750 | 3.8 | 252952 | 3.9 |
| Mala, Madiga | Mala | 4.0 | ML9 | AAGCACGAT | 199654 | 5.0 | 325742 | 5.0 |
| Mala, Madiga | Mala | 4.0 | ML10 | CCACAGTAA | 162946 | 4.1 | 271689 | 4.2 |
| Mala, Madiga | Mala | 4.0 | ML12 | GCTGGATGT | 126088 | 3.2 | 203590 | 3.1 |
| Mala, Madiga | Mala | 4.0 | ML13 | TGTGACTCT | 158316 | 4.0 | 256317 | 4.0 |
| Mala, Madiga | Mala | 4.0 | ML14 | GCATAGCCT | 171295 | 4.3 | 268632 | 4.2 |
| TSI | TSI | 4.0 | NA20509 | ATCCGCTTG | 73114 | 3.5 | 152869 | 3.7 |
| TSI | TSI | 4.0 | NA20510 | TCTAGCTAG | 84063 | 4.1 | 158099 | 3.8 |
| TSI | TSI | 4.0 | NA20512 | GACCAATCA | 99643 | 4.8 | 205580 | 4.9 |
| TSI | TSI | 4.0 | NA20515 | GTCCTTCGT | 80157 | 3.9 | 158517 | 3.8 |
| TSI | TSI | 4.0 | NA20516 | GTAGACATC | 82628 | 4.0 | 157715 | 3.8 |
| TSI | TSI | 4.0 | NA20518 | CCTAAGGTT | 74668 | 3.6 | 150063 | 3.6 |
| TSI | TSI | 4.0 | NA20519 | AGCCTGTCT | 81738 | 4.0 | 160822 | 3.9 |
| TSI | TSI | 4.0 | NA20520 | ACCTAGGAC | 90653 | 4.4 | 173628 | 4.2 |
| TSI | TSI | 4.0 | NA20521 | TGGATGGAT | 90237 | 4.4 | 179224 | 4.3 |
| TSI | TSI | 4.0 | NA20524 | CATGTAGTC | 78408 | 3.8 | 146293 | 3.5 |
| TSI | TSI | 4.0 | NA20525 | TAGACCGTC | 84072 | 4.1 | 168352 | 4.0 |
| TSI | TSI | 4.0 | NA20527 | CAGAGGACA | 103796 | 5.0 | 207490 | 5.0 |
| TSI | TSI | 4.0 | NA20528 | CTCTCAGAT | 73379 | 3.6 | 148490 | 3.6 |
| TSI | TSI | 4.0 | NA20534 | CTCTAGTCG | 88998 | 4.3 | 172627 | 4.1 |
| TSI | TSI | 4.0 | NA20538 | CTATATCGC | 46805 | 2.3 | 85138 | 2.0 |
| TSI | TSI | 4.0 | NA20539 | AGTAACGGC | 73420 | 3.6 | 164283 | 3.9 |
| TSI | TSI | 4.0 | NA20543 | GGCGAAGTT | 84305 | 4.1 | 167257 | 4.0 |
| TSI | TSI | 4.0 | NA20544 | GTGACGTCT | 105805 | 5.1 | 212226 | 5.1 |
| TSI | TSI | 4.0 | NA20581 | ACACGAGTT | 70582 | 3.4 | 139709 | 3.4 |
| TSI | TSI | 4.0 | NA20586 | CGCATCTTA | 76769 | 3.7 | 158349 | 3.8 |
| TSI | TSI | 4.0 | NA20588 | AAGCACGAT | 105409 | 5.1 | 217587 | 5.2 |
| TSI | TSI | 4.0 | NA20752 | CCACAGTAA | 89373 | 4.3 | 207340 | 5.0 |
| TSI | TSI | 4.0 | NA20754 | GCTGGATGT | 75085 | 3.6 | 153264 | 3.7 |
| TSI | TSI | 4.0 | NA20755 | TGTGACTCT | 75056 | 3.6 | 174120 | 4.2 |
| TSI | TSI | 4.0 | NA20758 | GCATAGCCT | 73372 | 3.6 | 145124 | 3.5 |
| Variable | Pygmy | 1.0 | AFP15 | GTGACGTCT | 39690 | 0.5 | 48836 | 0.5 |
| Variable | Pygmy | 1.0 | AFP19 | ACACGAGTT | 15650 | 0.2 | 18710 | 0.2 |
| Variable | Pygmy | 1.0 | AFP32 | CATGTAGTC | 115744 | 1.5 | 138373 | 1.4 |
| Variable | Pygmy | 2.0 | AFP3 | TAGACCGTC | 28760 | 0.4 | 35819 | 0.4 |
| Variable | Pygmy | 2.0 | AFP8 | CAGAGGACA | 53607 | 0.7 | 65290 | 0.7 |
| Variable | Pygmy | 2.0 | AFP13 | AGTAACGGC | 31598 | 0.4 | 46024 | 0.5 |
| Variable | Pygmy | 2.0 | AFP14 | GGCGAAGTT | 53267 | 0.7 | 64835 | 0.7 |
| Variable | Pygmy | 2.0 | AFP26 | AGCCTGTCT | 212573 | 2.7 | 255029 | 2.6 |
| Variable | Pygmy | 2.0 | AFP28 | ACCTAGGAC | 147580 | 1.9 | 176164 | 1.8 |
| Variable | Pygmy | 2.0 | AFP29 | TGGATGGAT | 219282 | 2.8 | 268968 | 2.8 |
| Variable | Pygmy | 2.0 | AFP34* | AAGCACGAT | 282750 | 3.6 | 346129 | 3.6 |
| Variable | Pygmy | 2.0 | AFP34* | CCACAGTAA | 83574 | 1.1 | 104663 | 1.1 |
| Variable | Pygmy | 2.0 | AFP34* | GCTGGATGT | 54621 | 0.7 | 66772 | 0.7 |
| Variable | Pygmy | 2.0 | AFP34* | TGTGACTCT | 36003 | 0.5 | 43833 | 0.5 |
| Variable | Pygmy | 4.0 | AFP9 | CTCTCAGAT | 83844 | 1.1 | 101944 | 1.1 |
| Variable | Pygmy | 4.0 | AFP11 | CTCTAGTCG | 35253 | 0.4 | 43567 | 0.5 |
| Variable | Pygmy | 4.0 | AFP12 | CTATATCGC | 28189 | 0.4 | 34508 | 0.4 |
| Variable | Pygmy | 8.0 | AFP20* | GACCAATCA | 1062703 | 13.4 | 1296428 | 13.4 |
| Variable | Pygmy | 8.0 | AFP21 | GTCCTTCGT | 680731 | 8.6 | 839559 | 8.7 |
| Variable | Pygmy | 8.0 | AFP24 | GTAGACATC | 651078 | 8.2 | 793328 | 8.2 |
| Variable | Pygmy | 7.0 | AFP25 | CCTAAGGTT | 717753 | 9.0 | 874242 | 9.0 |
| Variable | Pygmy | 10.0 | AFP34* | CGCATCTTA | 1068991 | 13.4 | 1317227 | 13.6 |
| Variable | Vietnamese | 10.0 | VIET4 | TCTAGCTAG | 1082882 | 13.6 | 1280144 | 13.2 |
| Variable | Venter | 10.0 | Venter | ATCCGCTTG | 1163692 | 14.6 | 1411296 | 14.6 |

1: Intended pooling proportion of a sample in its library.

2: Observed fraction of indexed, uniquely-mapping reads with expected *Alu* sequence for a sample out of the total such reads in its library.

3: Observed fraction of indexed reads for a sample out of the total indexed reads in its library.

* Replicate samples for AFP20 and AFP34

## Table S3

Table S3: Comparison of *Alu*Yb8/9 insertion genotypes from Watkins et al. (2003) with ME-Scan results

| ME-Scan1 | Electrophoresis Genotypes (number of insertion alleles) | | | | | |  |
| --- | --- | --- | --- | --- | --- | --- | --- |
|  | 0 | | 1 | | 2 | No Data | Total |
| Absent | 1277 | | 133 | | 20 | 19 | 1449 |
| Present | 61 | | 1374 | | 1485 | 31 | 2951 |
| Total | 1338 | | 1507 | | 1505 | 50 | 4400 |
|  | ME-Scan Genotype Comparisons | | | | | |  |
| ME-Scan | Electrophoresis Genotypes (number of insertion alleles) | | | | | |  |
| Genotypes2 | 0 | 1 | | 2 | | No Data | Total |
| 0 | 1277 | 133 | | 20 | | 19 | 1449 |
| 1 | 47 | 1187 | | 880 | | 26 | 2140 |
| 2 | 14 | 187 | | 605 | | 5 | 811 |
| Total | 1338 | 1507 | | 1505 | | 50 | 4400 |

1ME-Scan presence/absence states for *Alu*Yb8/9 insertions

2Genotypes estimated from ME-Scan read counts for *Alu*Yb8/9 insertion loci.

## Table S4

Table S4: Novel *Alu* insertions validated by locus-specific PCR and gel electrophoresis. See methods for details.

| Insertions observed in a single individual | | | |  |  |  |  |
| --- | --- | --- | --- | --- | --- | --- | --- |
| Chromosome | *Alu* Strand | *Alu* Junction Position | Ind. UID | # read sets | Corrected # read sets | Primer name | Result |
| chr20 | - | 32479753 | AFP26 | 8 | 6.27 | P#20s#10X#1 | -/- |
| chr4 | - | 136592258 | AFP23 | 10 | 6.72 | P#20s#10X#2 | +/- |
| chr8 | - | 127362550 | AFP26 | 9 | 7.06 | P#20s#10X#3 | -/- |
| chr2 | - | 11718152 | AFP26 | 9 | 7.06 | P#20s#10X#4 | -/- |
| chr4 | + | 127365700 | AFP4 | 9 | 7.12 | P#20s#10X#5 | +/- |
| chr19 | + | 23578459 | AFP29 | 10 | 7.44 | P#20s#10X#6 | -/- |
| chr5 | - | 167620678 | AFP10 | 11 | 7.59 | P#20s#10X#7 | -/- |
| chr3 | + | 61235946 | AFP26 | 10 | 7.84 | P#20s#10X#8 | -/- |
| chr3 | - | 41502328 | AFP26 | 10 | 7.84 | P#20s#10X#9 | -/- |
| chr4 | - | 113624552 | AFP29 | 11 | 8.18 | P#20s#10X#10 | -/- |
| chr3 | + | 23899473 | AFP26 | 11 | 8.63 | P#20s#10X#11 | -/- |
| chr3 | - | 41287940 | AFP4 | 11 | 8.71 | P#20s#10X#12 | -/- |
| chr8 | + | 37437903 | AFP23 | 13 | 8.74 | P#20s#10X#13 | -/- |
| chr15 | + | 38846413 | AFP29 | 12 | 8.92 | P#20s#10X#14 | -/- |
| chr14 | + | 25566091 | AFP29 | 12 | 8.92 | P#20s#10X#15 | +/- |
| chr4 | + | 60056075 | AFP5 | 17 | 9.04 | P#20s#10X#16 | +/- |
| chr22 | - | 48157772 | AFP26 | 12 | 9.41 | P#20s#10X#17 | -/- |
| chr5 | - | 138533825 | AFP26 | 12 | 9.41 | P#20s#10X#18 | -/- |
| chr9 | - | 8270745 | AFP23 | 14 | 9.41 | P#20s#10X#19 | -/- |
| chr7 | - | 61821912 | AFP29 | 13 | 9.67 | P#20s#10X#20 | -/- |
| chr6 | - | 32205004 | AFP23 | 15 | 10.08 | P#31s#50X#1 | -/- |
| chr4 | + | 69076841 | AFP5 | 19 | 10.11 | P#31s#50X#2 | +/- |
| chr1 | - | 7514062 | AFP10 | 15 | 10.35 | P#31s#50X#3 | -/- |
| chr4 | - | 42659585 | AFP10 | 15 | 10.35 | P#31s#50X#4 | -/- |
| chr19 | - | 51699808 | AFP10 | 16 | 11.04 | P#31s#50X#5 | -/- |
| chr2 | + | 57638757 | AFP4 | 14 | 11.08 | P#31s#50X#6 | -/- |
| chr2 | + | 156686373 | AFP4 | 15 | 11.87 | P#31s#50X#7 | -/- |
| chr3 | - | 126280707 | AFP29 | 16 | 11.9 | P#31s#50X#8 | -/- |
| chr1 | - | 187181448 | AFP23 | 18 | 12.1 | P#31s#50X#9 | -/- |
| chr2 | - | 176474577 | AFP29 | 17 | 12.64 | P#31s#50X#10 | +/- |
| chr20 | + | 53577158 | AFP26 | 17 | 13.33 | P#31s#50X#11 | -/- |
| chr12 | - | 26669992 | AFP4 | 18 | 14.25 | P#31s#50X#12 | +/- |
| chr7 | - | 117994247 | AFP10 | 21 | 14.48 | P#31s#50X#13 | +/- |
| chr6 | + | 25308132 | AFP10 | 21 | 14.48 | P#31s#50X#14 | +/- |
| chr4 | + | 121091363 | AFP4 | 19 | 15.04 | P#31s#50X#15 | +/- |
| chr15 | - | 50842145 | AFP26 | 20 | 15.68 | P#31s#50X#16 | +/- |
| chr9 | + | 10645337 | AFP10 | 23 | 15.86 | P#31s#50X#17 | +/- |
| chr1 | - | 28095389 | AFP5 | 37 | 19.68 | P#31s#50X#18 | +/- |
| chr12 | + | 32974807 | AFP10 | 29 | 20 | P#31s#50X#19 | +/- |
| chr3 | - | 82501658 | AFP5 | 39 | 20.75 | P#31s#50X#20 | +/- |
| chr2 | - | 4038041 | AFP29 | 30 | 22.31 | P#31s#50X#21 | -/- |
| chr2 | + | 220574606 | AFP26 | 32 | 25.1 | P#31s#50X#22 | -/- |
| chr15 | - | 58949509 | AFP5 | 53 | 28.2 | P#31s#50X#23 | +/- |
| chr1 | + | 38440751 | AFP4 | 37 | 29.29 | P#31s#50X#24 | +/- |
| chr8 | - | 58100083 | AFP10 | 44 | 30.35 | P#31s#50X#25 | +/- |
| chr2 | + | 65237617 | AFP10 | 45 | 31.04 | P#31s#50X#26 | +/- |
| chr18 | + | 66771805 | AFP4 | 41 | 32.45 | P#31s#50X#27 | +/- |
| chr14 | + | 23218666 | AFP29 | 44 | 32.72 | P#31s#50X#28 | -/- |
| chr15 | + | 90008849 | AFP26 | 46 | 36.07 | P#31s#50X#29 | +/- |
| chr18 | + | 62711312 | AFP5 | 71 | 37.77 | P#31s#50X#30 | +/- |
| chr7 | - | 117357107 | AFP4 | 48 | 37.99 | P#31s#50X#31 | +/- |
|  |  |  |  |  |  |  |  |
| Insertions observed in two individuals | | |  |  |  |  |  |
| Chromosome | *Alu* Strand | *Alu* Junction Position | Ind. UID | # read sets | Corrected # read sets | Primer name | Result |
| chr9 | + | 73855551 | AFP10 | 11 | 7.59 | P#27d#50X#1 | +/- |
| chr11 | - | 27001069 | AFP23 | 14 | 9.41 | P#27d#50X#2 | -/- |
| chr7 | + | 116046361 | AFP29 | 18 | 13.38 | P#27d#50X#3 | -/- |
| chr8 | - | 21187706 | AFP4 | 18 | 14.25 | P#27d#50X#4 | -/- |
| chrY | + | 21808627 | AFP5 | 27 | 14.36 | P#27d#50X#5 | +/+ |
| chr3 | - | 88523140 | AFP23 | 22 | 14.79 | P#27d#50X#6 | -/- |
| chr8 | + | 5797043 | AFP5 | 29 | 15.43 | P#27d#50X#7 | +/- |
| chr1 | + | 68327506 | AFP4 | 21 | 16.62 | P#27d#50X#8 | +/- |
| chr11 | + | 77156264 | AFP23 | 28 | 18.82 | P#27d#50X#10 | -/- |
| chr3 | - | 115647837 | AFP10 | 30 | 20.69 | P#27d#50X#11 | +/- |
| chr11 | + | 73449553 | AFP23 | 32 | 21.51 | P#27d#50X#12 | -/- |
| chr7 | - | 64256769 | AFP29 | 29 | 21.56 | P#27d#50X#13 | +/- |
| chr14 | - | 33691204 | AFP23 | 33 | 22.18 | P#27d#50X#14 | +/- |
| chr10 | + | 109672781 | AFP26 | 31 | 24.31 | P#27d#50X#15 | +/- |
| chr2 | - | 148253777 | AFP10 | 36 | 24.83 | P#27d#50X#16 | -/- |
| chr11 | + | 25119910 | AFP26 | 37 | 29.02 | P#27d#50X#17 | -/- |
| chr1 | - | 227726034 | AFP29 | 41 | 30.49 | P#27d#50X#18 | +/- |
| chr3 | - | 79119247 | AFP10 | 45 | 31.04 | P#27d#50X#19 | +/- |
| chr2 | - | 151909233 | AFP10 | 46 | 31.73 | P#27d#50X#20 | +/- |
| chr7 | - | 124228806 | AFP26 | 43 | 33.72 | P#27d#50X#21 | ?/? |
| chr1 | + | 218155078 | AFP26 | 43 | 33.72 | P#27d#50X#22 | +/- |
| chr15 | - | 57380189 | AFP4 | 44 | 34.83 | P#27d#50X#23 | +/- |
| chr1 | - | 101896647 | AFP29 | 50 | 37.18 | P#27d#50X#24 | +/- |
| chr1 | + | 74908560 | AFP26 | 52 | 40.78 | P#27d#50X#25 | +/- |
| chr15 | + | 23189086 | AFP4 | 54 | 42.74 | P#27d#50X#26 | +/- |
| chr1 | - | 35495066 | AFP29 | 64 | 47.59 | P#27d#50X#27 | -/- |

## Table S5

Table S5: Primer sets used to validate novel *Alu* insertions listed in Table S4.

| Primer set name | Forward (5'->3') | Reverse (5'->3') | Annealing temp. (Tm-5°C, °C) | Genomic Position | Product size w/o *Alu*, bp |
| --- | --- | --- | --- | --- | --- |
| P#20s#10X#1 | GGGCCATATCTGAGTCTGGT | AGTTGTTTGGCACCTGGTCT | 55 | chr20:32479369+32479851 | 483bp |
| P#20s#10X#2 | GGCAGTATGTGTTTTCAGCCT | ACTTGTTGGTTTACCTCTGCA | 60 | chr4:136592058+136592729 | 672bp |
| P#20s#10X#3 | TTTCCCATTCTGTGAATCTGG | CAACTTGGCACAGGGCTTAT | 55 | chr8:127362450+127362615 | 166bp |
| P#20s#10X#4 | CACACCCGACTCTTCCTTCC | ACTGGAACAAGTACTGGCGG | 55 | chr2:11717860+11718463 | 604bp |
| P#20s#10X#5 | CAGAACTATCGGGGAAGGGC | GTACCATCCCGACCTTGACC | 55 | chr4:127365318+127365748 | 431bp |
| P#20s#10X#6 | ACGGATTGTGGAGCTGACTG | TTTCCCATGCTCTGAGGTGG | 55 | chr19:23578017+23578511 | 495bp |
| P#20s#10X#7 | CACACTGCAAAGCCTTCTGC | AGCAATACCCCCAGCTGTTC | 55 | chr5:167620604+167621013 | 410bp |
| P#20s#10X#8 | AGAAACAAGAGGCGGGACTG | AATGCTCCCAGGTCAAGTGG | 55 | chr3:61235874+61236198 | 325bp |
| P#20s#10X#9 | GAAAGTCATGGCCCACAGGA | GGCACGTGTCAGAATCTCCA | 55 | chr3:41502149+41502627 | 479bp |
| P#20s#10X#10 | CTGTTGTGGCAAGCGACAAG | CTCTCCTGTCCTGGGGTACA | 55 | chr4:113624210+113624906 | 697bp |
| P#20s#10X#11 | GCCTGTCGAGTCACGTTACA | ATCTGCCATAGAGCCTTCGC | 55 | chr3:23899042+23899631 | 590bp |
| P#20s#10X#12 | CCAGGATTCGTGGAATCAGT | GATGCAAAGCACAGTCCTCA | 55 | chr3:41287891+41288102 | 212bp |
| P#20s#10X#13 | CCAGAGGAGACAAAGCAGCA | TGACCACGTCTTCTTCCTGC | 55 | chr8:37437576+37437934 | 359bp |
| P#20s#10X#14 | TGGCAATCTCTGGGGTTGAC | AGCAGGCATCACCAGTTCTC | 55 | chr15:38846259+38846852 | 594bp |
| P#20s#10X#15 | TGGAAAGATTCGCAGGCAGT | TACTCACACCCGTGGACTCA | 60 | chr14:25565877+25566551 | 675bp |
| P#20s#10X#16 | GGATGACACAAAGGGACACG | TTTGCCAGTGGGGATGGATG | 55 | chr4:60056015+60056177 | 163bp |
| P#20s#10X#17 | ACTATGCCAGGGTCGTAGGT | ACTTGAGACATCCTGCTGGC | 55 | chr22:48157744+48158146 | 403bp |
| P#20s#10X#18 | AAATTTCCACGGCCCCATCT | GAAGCAAAAGCAGGCGTGAA | 55 | chr5:138533704+138534266 | 563bp |
| P#20s#10X#19 | TTGCCTTTTCCAGAATTTCG | CCAAAACATGGACGCAACTA | 55 | chr9:8270628+8270842 | 215bp |
| P#20s#10X#20 | GACTCGGCTGCCAGATCTAC | TTGGACACAGCACACTTGGT | 55 | chr7:61821742+61822065 | 324bp |
| P#31s#50X#1 | TGTTTCAAAATTAGATTGTGGTGA | CTGCAGCTCTTGACAGCAAA | 55 | chr6:32204553+32205048 | 224bp |
| P#31s#50X#2 | TGAAGGACAGGAAATCAGCA | CATGTTCTGAAACCTCATTGGA | 55 | chr4:69076720+69076915 | 196bp |
| P#31s#50X#3 | GGAGCTGCTGTGGAGTCTTT | TAAGCTCTGGGATCCCCTCC | 55 | chr1:7513894+7514135 | 242bp |
| P#31s#50X#4 | GCGAAAGGGTCTGGGACTAC | ATGGACAAGAGCACCATGGG | 55 | chr4:42659548+42659751 | 204bp |
| P#31s#50X#5 | AATTTCAATGGCTGCAGGGC | CACAAGTCCACCCCTGTGTA | 55 | chr19:51699315+51700008 | 694bp |
| P#31s#50X#6 | ATGTCAACGGAAGCCAAAAA | TCATACATCTGGGTGCTCCA | 55 | chr2:57638613+57638785 | 173bp |
| P#31s#50X#7 | TGGGTAGAAACATAGAGCCAAA | CCTTTGCCCTTAGGGAACTC | 55 | chr2:156686216+156686465 | 250bp |
| P#31s#50X#8 | TTGGGGGTTCTGTTGTTAGG | TGCAAGTAAAAGGGTGGAAGA | 55 | chr3:126280620+126280822 | 203bp |
| P#31s#50X#9 | CCTGGTAGCGCTTGGAGATT | TGGGGGTCTTTTTCTAGGGC | 60 | chr1:187181436+187181887 | 452bp |
| P#31s#50X#10 | CGGAGCTGTTTCCTCTGTGT | GCCTCCCATAGACCACGATG | 55 | chr2:176474387+176474905 | 519bp |
| P#31s#50X#11 | TCTTTGGGAAATGCTGTTGCT | TGAGTCAAGAATGAGCAAGCT | 55 | chr20:53576816+53577455 | 640bp |
| P#31s#50X#12 | CAGTGAATGGAAGACTCAGCA | TGCAAGGGATCTTTTGAAGTTT | 55 | chr12:26669833+26670028 | 196bp |
| P#31s#50X#13 | TGTCCTTTGTCCTGCACTTG | ATGACCCAACCCACCAGTAA | 55 | chr7:117994062+117994311 | 250bp |
| P#31s#50X#14 | AGGCTTCCACTGGGATCTGA | CCTGCCGTAACAACACTTGC | 55 | chr6:25307916+25308198 | 283bp |
| P#31s#50X#15 | TGAGTCTGGCCTCATTGCAG | AGTTTTGTGGGACAGCTCCA | 55 | chr4:121091234+121091400 | 167bp |
| P#31s#50X#16 | TATCCGGACTGAATCCCAGA | AACCAGTGCTGGGACAAATC | 55 | chr15:50841999+50842187 | 189bp |
| P#31s#50X#17 | ACACTTCGCAAAGATGTACGG | CATGGGAGTCTGTGGTGGAC | 55 | chr9:10645236+10645491 | 256bp |
| P#31s#50X#18 | ATGCATTGTTGGGAAGAGGT | TGGATGTTTGCATTGTTTCC | 55 | chr1:28095324+28095514 | 191bp |
| P#31s#50X#19 | TTGCTCTTTTCCTCCGGCAT | CCTGGTGCTATCCTGGACAC | 55 | chr12:32974426+32974854 | 429bp |
| P#31s#50X#20 | CAAGATTTCACCTGGCTGCT | GCAAATTTCTGCAACCTGCT | 55 | chr3:82501591+82501788 | 198bp |
| P#31s#50X#21 | TTTCACAGGCTGGTGTTGAG | AGAAATTTGCCACAGGGTTG | 60 | chr2:4038003+4038226 | 224bp |
| P#31s#50X#22 | GGAGAGCACAGTTCCTGCTT | TGGAGGGGAAGGTTGGAAGT | 55 | chr2:220574345+220574768 | 424bp |
| P#31s#50X#23 | GGCCTTTGCTGGTTTGATTA | GCCTCAAAAGGGCAAACATA | 55 | chr15:58949329+58949542 | 214bp |
| P#31s#50X#24 | CCAAATCTGTAGTGGCACGC | GCATTTTGCTTTCCCTGCCA | 55 | chr1:38440361+38440904 | 544bp |
| P#31s#50X#25 | ATGCTGTGGGAAAGTGGAAC | AGCTGATGAACATTTGGGTTG | 55 | chr8:58100013+58100246 | 234bp |
| P#31s#50X#26 | CCATTTTGGGCAGCTTTCAGA | CATCCCCTGTACCAAGCCTG | 55 | chr2:65237486+65238050 | 565bp |
| P#31s#50X#27 | TTCCCTCCTTTTGCAGTGCA | GCATCACAGAGGAAGGGCTT | 55 | chr18:66771647+66771862 | 216bp |
| P#31s#50X#28 | CTGGTGGCTTTCCCTAGTGG | TTCGGGTGAGTGGTGTGAAG | 55 | chr14:23218587+23218874 | 288bp |
| P#31s#50X#29 | AGCCCCCGGTAACTCTGTAT | GGACTGGGCATCTTGGTACT | 55 | chr15:90008711+90008941 | 231bp |
| P#31s#50X#30 | ACAACAAGCAACTCTGGTGC | ACCTGGCTCCTGGGTATCAT | 55 | chr18:62710972+62711520 | 549bp |
| P#31s#50X#31 | ATAATCCTGCTCTCTGCGCC | GTGGATGCGGGGGTACTAAG | 55 | chr7:117356988+117357519 | 532bp |
| P#27d#50X#1 | GCACCCATGCCAGATTCTTT | CTTGCAACCTCTCTCCGTGA | 55 | chr9:73855106+73855659 | 554bp |
| P#27d#50X#2 | TTGGTTCCATGTCTTTGCTG | TGCTGGTGAGGATATGGAGA | 60 | chr11:27000862+27001106 | 245bp |
| P#27d#50X#3 | TGGAAGGTTTGTGAGAAGACG | TGATCAGGCTACTCCAAGTACA | 55 | chr7:116046185+116046339 | 155bp |
| P#27d#50X#4 | GCACAGCGTACAAAATGTGTG | CATCCTCTATGCCCAATACCA | 55 | chr8:21187490+21187728 | 239bp |
| P#27d#50X#5 | ATGGGTGGCATTGCTACATT | TGGTACTTCGCACTTTGCAG | 55 | chrY:21808517+21808720 | 204bp |
| P#27d#50X#6 | ATTTTGCCCCTGCCTAAGAT | CAGCCAGCTTGAATTTCTCC | 55 | chr3:88523080+88523307 | 228bp |
| P#27d#50X#7 | TGGCCGAGGCAAAAAGAAATC | GCACCCCTAGTCCAGTGTTT | 55 | chr8:5796760+5797407 | 648bp |
| P#27d#50X#8 | CAGTGCTTGCCTTTTTGACA | AAGCCCACGAAACAAAACAC | 55 | chr1:68327398+68327586 | 189bp |
| P#27d#50X#9 | same as PH27d#50X#5 |  |  |  |  |
| P#27d#50X#10 | TCTTTTCCTGACCATCCAGCC | GCCTGAGGTCAGTTTTTCCCT | 60 | chr11:77155972+77156593 | 622bp |
| P#27d#50X#11 | TGAGGAGGGGCTGTAAAGGA | TGGTAGGCTCTAGGGACACC | 55 | chr3:115647532+115647956 | 425bp |
| P#27d#50X#12 | GGCTAAAATGGTCAGGGACA | TGAATCTTCCTGCCTCAACC | 60 | chr11:73449404+73449613 | 210bp |
| P#27d#50X#13 | TCGGCCCACTGGATTCTCTA | CTTGGACATCACCCAGCCAT | 55 | chr7:64256519+64257045 | 527bp |
| P#27d#50X#14 | ACAAGGGTCATGGCTGAAAC | TTGTTGGAATTCCCCTCAAG | 55 | chr14:33691083+33691312 | 230bp |
| P#27d#50X#15 | AAGCCTGACCCACACTTGTC | TCCTGAGAACATCCACACAGC | 55 | chr10:109672411+109672923 | 513bp |
| P#27d#50X#16 | TAGTCAGCAGCCAGCAACAT | GCAATGCCATTTTCCCTAAA | 55 | chr2:148253489+148253649 | 161bp |
| P#27d#50X#17 | GGCAGTTTCTCTCCCTGTCT | GTGGATCTGTGCAAGAGGTGA | 55 | chr11:25119899+25120217 | 319bp |
| P#27d#50X#18 | CTTCCAAAGGCGGTTGTGTG | CCGTTCAGTGCTTTGGGTTG | 55 | chr1:227725748+227726437 | 690bp |
| P#27d#50X#19 | TTTTCCCTCAACTGGTCTTGA | TGGGACTACCACACTGGATG | 55 | chr3:79119139+79119366 | 228bp |
| P#27d#50X#20 | GGCCTGCTTGGTGAAGGTAT | TTGTGGTCAGGCTGAAGGAC | 55 | chr2:151909224+151909512 | 289bp |
| P#27d#50X#21 | THE1B, multi-copies |  |  |  |  |
| P#27d#50X#22 | ACATAGCCCCTGCCATCATG | TCTACATGCAGCATCCAGGC | 55 | chr1:218154585+218155218 | 634bp |
| P#27d#50X#23 | TCCTGGGAGCCATGTTTGAC | AAGGGAGTGGTTGCAGTGAC | 55 | chr15:57380160+57380387 | 228bp |
| P#27d#50X#24 | ACACGTTCCCTACTGCCTTC | AAGGGCCTGTGCATCTTTCA | 55 | chr1:101896570+101896913 | 344bp |
| P#27d#50X#25 | TTTTAGCATACAAACCTTGCATATTT | AAGCAGGTTTTGAATTTTCATGT | 55 | chr1:74908338+74908585 | 248bp |
| P#27d#50X#26 | AAGCCTCTGCAAGATGGAGC | GCATTGCTGCCACTACACAG | 55 | chr15:23188738+23189378 | 641bp |
| P#27d#50X#27 | AACAAGGTCTGCTACGTCCT | TCAGGCACCATTCTTACCACC | 55 | chr1:35494841+35495067 | 227bp |

## Table S6

Table S6: 17 genes with potential *Alu* insertions in protein-coding exons tested by locus-specific PCR.

| Gene | Chr | Junction location | Strand | # Ind | Ind UID | # Reads | Coverage-Corrected # Reads | Results |
| --- | --- | --- | --- | --- | --- | --- | --- | --- |
| *ZNF292* | chr6 | 87965119 | - | 1 | AFP21 | 10 | 2 | - |
| *RBM20* | chr10 | 112559573 | - | 1 | AFP34 | 20 | 2 | - |
| *SNX32* | chr11 | 65618289 | - | 1 | VIET4 | 10 | 2 | - |
| *SH2D5* | chr1 | 21052531 | + | 2 | AFH6 | 6 | 5 | - |
| *NUP210* | chr3 | 13360633 | + | 1 | AFP21 | 19 | 5 | - |
| *SPTBN2* | chr11 | 66472509 | - | 1 | M7 | 10 | 5 | - |
| *HERC2* | chr15 | 28362519 | - | 1 | AFP21 | 19 | 5 | ~35 bp |
| *CTIF* | chr18 | 46287768 | - | 1 | AFP33 | 11 | 5 | - |
| *MARCKSL1* | chr1 | 32800466 | + | 2 | I25 | 7 | 6 | Assay failed |
| *MPP2 / DLG2* | chr11 | 84245612 | + | 1 | NA19347 | 12 | 7 | - |
| *PRMT6* | chr1 | 107599818 | - | 2 | ML7 | 10 | 8 | - |
| *TRABD2A / C2orf89* | chr2 | 85069039 | - | 2 | ML12 | 12 | 12 | - |
| *FAM187B* | chr19 | 35719278 | - | 2 | NA19371 | 45 | 34 | ~350 bp |
| *ZMYM4* | chr1 | 35824763 | + | 1 | AFP11 | 8 | 37 | - |
| *SYNM* | chr15 | 99670672 | + | 1 | AFP9 | 21 | 41 | - |
| *EPHA7* | chr6 | 94120371 | - | 1 | AFP11 | 11 | 50 | - |
| *WWC1* | chr5 | 167855752 | - | 2 | AFP15 | 27 | 111 | - |

## Table S7

Table S7: Primer sets used to validate potential novel *Alu* insertions in protein-coding sequences listed in Table S6.

| Locus | Forward primer | Reverse primer |
| --- | --- | --- |
| *ZNF292* | GTTGCCCCATATGTGCAAAGAACT | AGGCCTTCCCAATCTTCTTAATGG |
| *RBM20* | TCAAGTCCAGTGAGTGTCCTTCCTT | CGAATGAGCAACTTCTCACCATTG |
| *SNX32* | GAGTGTCCGGGGGAAGAACAG | AGAGGAGCACCAGGGGTTACCTT |
| *SH2D5* | GTTTCGAGCCATGAAGGCAAACT | GTCTGATGGGGGCCTCACACT |
| *NUP210* | CTACTCACAGTGGGGGCTGTGTC | GACCTGCTCTAACCAACCCTGTG |
| *SPTBN* | AACCAGGCCTCCATGTCGTTT | CAGCTGAACTCCAAGCCCAGTG |
| *HERC2* | TCGACTGTGGACACCCGAGAC | TCGTGTTGGAAGGTGTGTTTGTTC |
| *CTIF* | ACAGAGACCTCGGCTTCACTCAG | AGGATCTCGATCAGCTTGTCCATC |
| *MARCKSL1* | CTCTGTGGGTGAGGAGGCAGA | AAGGAGACCCCCAAGAAGAAGAAG |
| *MPP2 / DLG2* | CCAGCAAACATCTCCATTAGCAA | GAACCTCTCTCAAATAGAAAATGTCCA |
| *PRMT6* | GACTGTAGAGTTGCCGGAACAGGT | GAGAAGACCGCCCTCCTTCAG |
| *TRABD2A / C2orf89* | GTGCTCACCTGGGAGCTGTCAT | CGAGCAGGCAGTCTTCAGATCC |
| *FAM187B* | TCTGACCCAGGTCCTTGTGTGTTA | GGCAGCCTTCTCATTAAAGATCCA |
| *ZMYM4* | TCGTTGGTAGTGACAATGAGGATGA | TCATTGTCTGATTCATGCTGTGTGA |
| *SYNM* | GGGGAAAGGAAAACAAAGACTGA | TCCTATCATCTGCTCGGCTGACTT |
| *EPHA7* | TTTCCGCTTCTTCCTCTGCACT | CAAGAAGTGCTGGTCCATTATTGAG |
| *WWC1* | AAGCCTAACTCCTCCTCCCCTGTTG | CCTCGTCACTTACTTCAGGGCAAT |

## Table S8

Table S8: Sequences of 25 pairs of oligonucleotide adapters used in this work.

Adapter oligonucleotides: 5'-25 pairs of partially complementary oligonucleotides with 9-bp index sequences and terminal T at the 3' end of the longer oligonucleotide.

CA1ID1: 5'-CTCGGCATTCCTGCTGAACCGCTCTTCCGATCTATCCGCTTGT-3'

CA2ID1: 5'-CAAGCGGATAGATCGGAAGAGCG-3'

CA1ID2: 5'-CTCGGCATTCCTGCTGAACCGCTCTTCCGATCTTCTAGCTAGT-3'

CA2ID2: 5'-CTAGCTAGAAGATCGGAAGAGCG-3'

CA1ID3: 5'-CTCGGCATTCCTGCTGAACCGCTCTTCCGATCTGACCAATCAT-3'

CA2ID3: 5'-TGATTGGTCAGATCGGAAGAGCG-3'

CA1ID4: 5'-CTCGGCATTCCTGCTGAACCGCTCTTCCGATCTGTCCTTCGTT-3'

CA2ID4: 5'-ACGAAGGACAGATCGGAAGAGCG-3'

CA1ID5: 5'-CTCGGCATTCCTGCTGAACCGCTCTTCCGATCTGTAGACATCT-3'

CA2ID5: 5'-GATGTCTACAGATCGGAAGAGCG-3'

CA1ID6: 5'-CTCGGCATTCCTGCTGAACCGCTCTTCCGATCTCCTAAGGTTT-3'

CA2ID6: 5'-AACCTTAGGAGATCGGAAGAGCG-3'

CA1ID7: 5'-CTCGGCATTCCTGCTGAACCGCTCTTCCGATCTAGCCTGTCTT-3'

CA2ID7: 5'-AGACAGGCTAGATCGGAAGAGCG-3'

CA1ID8: 5'-CTCGGCATTCCTGCTGAACCGCTCTTCCGATCTACCTAGGACT-3'

CA2ID8: 5'-GTCCTAGGTAGATCGGAAGAGCG-3'

CA1ID9: 5'-CTCGGCATTCCTGCTGAACCGCTCTTCCGATCTTGGATGGATT-3'

CA2ID9: 5'-ATCCATCCAAGATCGGAAGAGCG-3'

CA1ID10: 5'-CTCGGCATTCCTGCTGAACCGCTCTTCCGATCTCATGTAGTCT-3'

CA2ID10: 5'-GACTACATGAGATCGGAAGAGCG-3'

CA1ID11: 5'-CTCGGCATTCCTGCTGAACCGCTCTTCCGATCTTAGACCGTCT-3'

CA2ID11: 5'-GACGGTCTAAGATCGGAAGAGCG-3'

CA1ID12: 5'-CTCGGCATTCCTGCTGAACCGCTCTTCCGATCTCAGAGGACAT-3'

CA2ID12: 5'-TGTCCTCTGAGATCGGAAGAGCG-3'

CA1ID13: 5'-CTCGGCATTCCTGCTGAACCGCTCTTCCGATCTCTCTCAGATT-3'

CA2ID13: 5'-ATCTGAGAGAGATCGGAAGAGCG-3'

CA1ID14: 5'-CTCGGCATTCCTGCTGAACCGCTCTTCCGATCTCTCTAGTCGT-3'

CA2ID14: 5'-CGACTAGAGAGATCGGAAGAGCG-3'

CA1ID15: 5'-CTCGGCATTCCTGCTGAACCGCTCTTCCGATCTCTATATCGCT-3'

CA2ID15: 5'-GCGATATAGAGATCGGAAGAGCG-3'

CA1ID16: 5'-CTCGGCATTCCTGCTGAACCGCTCTTCCGATCTAGTAACGGCT-3'

CA2ID16: 5'-GCCGTTACTAGATCGGAAGAGCG-3'

CA1ID17: 5'-CTCGGCATTCCTGCTGAACCGCTCTTCCGATCTGGCGAAGTTT-3'

CA2ID17: 5'-AACTTCGCCAGATCGGAAGAGCG-3'

CA1ID18: 5'-CTCGGCATTCCTGCTGAACCGCTCTTCCGATCTGTGACGTCTT-3'

CA2ID18: 5'-AGACGTCACAGATCGGAAGAGCG-3'

CA1ID19: 5'-CTCGGCATTCCTGCTGAACCGCTCTTCCGATCTACACGAGTTT-3'

CA2ID19: 5'-AACTCGTGTAGATCGGAAGAGCG-3'

CA1ID20: 5'-CTCGGCATTCCTGCTGAACCGCTCTTCCGATCTCGCATCTTAT-3'

CA2ID20: 5'-TAAGATGCGAGATCGGAAGAGCG-3'

CA1ID21: 5'-CTCGGCATTCCTGCTGAACCGCTCTTCCGATCTAAGCACGATT-3'

CA2ID21: 5'-ATCGTGCTTAGATCGGAAGAGCG-3'

CA1ID22: 5'-CTCGGCATTCCTGCTGAACCGCTCTTCCGATCTCCACAGTAAT-3'

CA2ID22: 5'-TTACTGTGGAGATCGGAAGAGCG-3'

CA1ID23: 5'-CTCGGCATTCCTGCTGAACCGCTCTTCCGATCTGCTGGATGTT-3'

CA2ID23: 5'-ACATCCAGCAGATCGGAAGAGCG-3'

CA1ID24: 5'-CTCGGCATTCCTGCTGAACCGCTCTTCCGATCTTGTGACTCTT-3'

CA2ID24: 5'-AGAGTCACAAGATCGGAAGAGCG-3'

CA1ID25: 5'-CTCGGCATTCCTGCTGAACCGCTCTTCCGATCTGCATAGCCTT-3'

CA2ID25: 5'-AGGCTATGCAGATCGGAAGAGCG-3'

# Supplementary Files

*See file Witherspoon_Supplement.zip.*

## Supplement File: Comparative_Genotypes.txt

Data underlying Table 1 of the main text. Tab-delimited text format.

Columns: Locus: name of *Alu* insertion locus in ([Watkins et al. 2003](#_ENREF_2)). Ind_UID. Chr: chromosome carrying insertion locus. ID_Jct_Pos: computed position of 5' end of *Alu* insertion. *Alu*_Strand: strand of *Alu* insertion (+ or -). MEScan_Present: whether the *Alu* insertion was observed (1) or not (0) in this individual. Gel_Genotype: the *Alu* insertion genotype for this individual at this locus, from Watkins et al. (2003). nReads: number of ME-Scan sequencing reads supporting this locus.

## Supplement File: *Alu*_Loci.txt

Listing of all *Alu* insertion loci observed in the ME-Scan experiments (tab delimited text).

Columns:

Chr: chromosome carrying insertion locus. ID_Jct_Pos: computed position of 5' end of *Alu* insertion. *Alu*_Strand: strand of *Alu* insertion (+ or -). nInd: number of individuals in which the insertion was observed. nLanes: number of sequencing lanes (equivalently, distinct libraries) in which the insertion was observed. nReads: total number of indexed, *Alu*-positive, uniquely-mapped reads supporting this locus across all samples. nMols: an index of the number of distinct molecules from which sequencing reads were generated: the number of distinct inferred insert sizes in the sequenced fragments, counted within samples and summed across them. RMSK_RepName: subfamily name of the insertion, as classified by RepeatMasker, where a reference element could be linked to the observed insertion. RMSK_GenoStart: starting point of the repeat in the human reference genome (hg19) according to RepeatMasker. RMSK_GenoEnd: ending point of the repeat according to RepeatMasker. OneKG_ID: identifier of the insertion in the 1000 genomes data set ([Stewart et al. 2011](#_ENREF_1)), where a match could be made; null otherwise. dbRIP_Name: identifier of the insertion in dbRIP (2010), where a match could be made. Exonic: 1 if the insertion 5' end appears to be in an exon as defined by UCSC and RefSeq gene models. CDS_Exonic: 1 if the insertion 5' end appears to be in a protein-coding exon as defined by UCSC and RefSeq gene models.

## Supplement File: *Alu*_Loci_by_Ind.txt

*Alu* insertion presence/absence information for all individuals and all loci as observed by ME-Scan (tab delimited text).

Columns: Ind_UID: individual unique identifier. Chr: chromosome carrying insertion locus. ID_Jct_Pos: computed position of 5' end of *Alu* insertion. *Alu*_Strand: strand of *Alu* insertion (+ or -). nInd: number of individuals in which the insertion was observed. nLanes: number of sequencing lanes (equivalently, distinct libraries) in which the insertion was observed. nReads: total number of indexed, *Alu*-positive, uniquely-mapped reads supporting this locus across all samples.

## Supplement File: dbRIP_AluMatch.txt

Listing of *Alu* insertion loci observed by ME-Scan and present in dbRIP (2010; tab delimited text).

Columns: Chr: chromosome carrying insertion locus. ID_Jct_Pos: computed position of 5' end of *Alu* insertion. *Alu*_Strand: strand of *Alu* insertion (+ or -). dbRIP_ChromStart: starting position of insertion in genome as indicated by dbRIP. dbRIP_ChromEnd: ending position of insertion per dbRIP. dbRIP_Name: dbRIP name of the insertion locus. dbRIP_OriginalID: list of original identifiers of the insertion locus. dbRIP_PolySubFamily: subfamily name of the insertion.

## Supplement File: KG_AluMatch.txt

Listing of *Alu* insertion loci present in 1000 Genomes Project data by Stewart et al. ([2011](#_ENREF_1)) and observed by ME-Scan (tab delimited text).

Columns: Chr: chromosome carrying insertion locus. ID_Jct_Pos: computed position of 5' end of *Alu* insertion. *Alu*_Strand: strand of *Alu* insertion (+ or -). RepName: name of repeat element per Stewart et al. KG_ID: unique identifier of insertion in Stewart et al. KG_hg19_ChromStart: starting position of insertion in genome as indicated by Stewart et al. KG_hg19_ChromEnd: ending position of insertion per Stewart et al. KG_hg19_Jct_Pos: position of the 5' end of the *Alu* insertion, computed from results of Stewart et al. KG_SubFamily: subfamily name of the insertion per Stewart et al.

## Supplement File: Hormozdiari2011_AluMatch.txt

Listing of *Alu* insertion loci identified by Hormozdiari et al. (2011) and observed by ME-Scan (tab delimited text).

Columns: Chr: chromosome carrying insertion locus. ID_Jct_Pos: computed position of 5' end of *Alu* insertion. *Alu*_Strand: strand of *Alu* insertion (+ or -). H2011_ChromStart: starting position of insertion in genome as indicated by Hormozdiari et al. H2011_ChromEnd: ending position of insertion per Hormozdiari et al. H2011_RowID: unique row identifier. H2011_SubFamily: name of repeat element per Hormozdiari et al. Total_nReads: total number of ME-Scan reads corresponding to this insertion. nInd: number of individuals carrying the insertion. Pos_Offset: difference between the ME-Scan position and Hormozdiari et al. positions for the insertion.

## Supplement File: Pop_Specific_Alu.txt

Summary and listing of *Alu* insertion loci at which the insertion allele was observed in only one population out of the six assayed with *AluSPv2* (tab delimited text).

Columns: Chr: chromosome carrying insertion locus. ID_Jct_Pos: computed position of 5' end of *Alu* insertion. Strand: strand of *Alu* insertion (+ or -). Population: population in which the *Alu* insertion was observed. nInd: number of indivduals with the insertion.

# References

Derrien T, Estelle J, Marco Sola S, Knowles DG, Raineri E, Guigo R, and Ribeca P. 2012. Fast computation and applications of genome mappability. *PLoS One* **7:** e30377.

Hormozdiari F, Alkan C, Ventura M, Hajirasouliha I, Malig M, Hach F, Yorukoglu D, Dao P, Bakhshi M, Sahinalp SC et al. 2011. Alu repeat discovery and characterization within human genomes. *Genome Res* **21:** 840-849.

Jurka J, Kohany O, Pavlicek A, Kapitonov VV, and Jurka MV. 2004. Duplication, coclustering, and selection of human Alu retrotransposons. *Proc Natl Acad Sci U S A* **101:** 1268-1272.

Rozen S and Skaletsky H. 2000. Primer3 on the WWW for general users and for biologist programmers. *Methods Mol Biol* **132:** 365-386.

Stewart C, Kural D, Stromberg MP, Walker JA, Konkel MK, Stutz AM, Urban AE, Grubert F, Lam HY, Lee WP et al. 2011. A comprehensive map of mobile element insertion polymorphisms in humans. *PLoS Genet* **7:** e1002236.

Watkins WS, Rogers AR, Ostler CT, Wooding S, Bamshad MJ, Brassington AM, Carroll ML, Nguyen SV, Walker JA, Prasad BV et al. 2003. Genetic variation among world populations: inferences from 100 Alu insertion polymorphisms. *Genome Res* **13:** 1607-1618.

Witherspoon DJ, Xing J, Zhang Y, Watkins WS, Batzer MA, and Jorde LB. 2010. Mobile element scanning (ME-Scan) by targeted high-throughput sequencing. *BMC Genomics* **11:** 410.

Xing J, Zhang Y, Han K, Salem AH, Sen SK, Huff CD, Zhou Q, Kirkness EF, Levy S, Batzer MA et al. 2009. Mobile elements create structural variation: analysis of a complete human genome. *Genome Res* **19:** 1516-1526.

Zingler N, Willhoeft U, Brose HP, Schoder V, Jahns T, Hanschmann KM, Morrish TA, Lower J, and Schumann GG. 2005. Analysis of 5' junctions of human LINE-1 and Alu retrotransposons suggests an alternative model for 5'-end attachment requiring microhomology-mediated end-joining. *Genome Res* **15:** 780-789.
